# Supplementary material for: Molecular Characterization and Expression of α‐Globin and β‐Globin Genes in the Euryhaline Flounder (Platichthys flesus)
Source: Hindawi journal article supplement (doi:10.1155/2011/965153), 2011-01-01

Supp.FIG.1A

|                     |                                         |    |
|---------------------|-----------------------------------------|----|
|                     | +-----A-----+ +-----B-----++-C          |    |
| flounder 1          | MSLSGKDKRVVKAIWEKMSKSDVIGAEALGRMLVSYPQT | 40 |
| flounder 2          | ---a---sl-rgl-a-aegrvld-g-----          | 40 |
| yellowtail A        | -----s-----f-d---p---ae-----tv----      | 40 |
| yellowtail B        | ---a---tt--kf-d-veg--ae-g-----a-----    | 40 |
| human 1             | -v-pd--tn---a-g-vgahagey-----e--fl-f-t- | 40 |
| human 2             | -v-pa--tn---a-g-vgahagey-----e--fl-f-t- | 40 |
| Functional Residues | B B 1 11122                             |    |

|                     |                                          |    |
|---------------------|------------------------------------------|----|
|                     | --+ +-----E-----+                        |    |
| flounder 1          | KTYFSHW. ADLSPSSAPVRKHGATIMAAVGDVGHMDDLQ | 79 |
| flounder 2          | ---ae-gt--t-q-qk-gh--gv-g--mg-kyivt-t    | 80 |
| yellowtail A        | -----.-vg-d--q-k-----ki---v              | 79 |
| yellowtail B        | -a---gs--n-qhpm-k---i--ggi-k--kni---v    | 80 |
| human 1             | ---p-f..--hg--q-kg--kkvad-ltn--a-v--mp   | 78 |
| human 2             | ---p-f..--hg--q-kg--kkmad-ltn--a-v--mp   | 78 |
| Functional Residues | 222 2 B H HH B                           |    |

|                     |                                          |     |
|---------------------|------------------------------------------|-----|
|                     | +---F---+ +-----G-----+                  |     |
| flounder 1          | GFLSKYSELHAFKLRVDPTNFKILAHNMILVMAMYFPKDF | 119 |
| flounder 2          | eam-sl-----t-----s-----si-----y--e       | 120 |
| yellowtail A        | -g--al-----a--r---i---t---t--            | 119 |
| yellowtail B        | rg--al-----a-----v--a-----a--            | 120 |
| human 1             | na--al-d--h-----v---l-s-cllvtl-ahl-ae-   | 118 |
| human 2             | na--al-d--h-----v---l-s-cllvtl-ahl-ae-   | 118 |
| Functional Residues | B 22 2222 1 1 11B 11 1                   |     |

|                     |                          |     |
|---------------------|--------------------------|-----|
|                     | +-----H-----+            |     |
| flounder 1          | TAEVHVSVDKFLQCLALALSEKYR | 143 |
| flounder 2          | -----f---s---w-----      | 144 |
| yellowtail A        | -p-i-----n-----a-r--     | 143 |
| yellowtail B        | -p-----rv---a-r--        | 144 |
| human 1             | -pa--a-l---asvstv-ts---  | 142 |
| human 2             | -pa--a-l---asvstv-ts---  | 142 |
| Functional Residues | 11 11 1 H 22             |     |

α-globin

SUPP.FIG.1B

|              |                                          |                                |     |
|--------------|------------------------------------------|--------------------------------|-----|
|              |                                          | +-----A-----++-----B-----++-C- |     |
| flounder 1   | MVQWTDSESAIISLWGKIDVGEIGPQALTRLLIVYPWTQ  |                                | 40  |
| flounder 2   | -----s-a-----                            |                                | 40  |
| yellowtail A | .-d--a--a--s-----                        |                                | 39  |
| yellowtail B | --d--a--a--t-----                        |                                | 40  |
| human        | --hl-pe-k--vta---vn-d-v-ge--g--v-----    |                                | 40  |
| Functional   |                                          | 1 11122                        |     |
| Residues     |                                          | 22                             |     |
|              |                                          |                                |     |
|              |                                          | +        +--D-++-----E-----+   |     |
| flounder 1   | RHFSTFGDLSTTAAILGSEKVAKHGKTVMGGLERAVKSLD |                                | 80  |
| flounder 2   | -----                                    |                                | 80  |
| yellowtail A | --t--nv--n---np--q-----n--n--            |                                | 79  |
| yellowtail B | --t--nv--n---np--q-----n--n--            |                                | 80  |
| human        | -f-ks-----pd--vm--np--ka--k-l-afsdglah-- |                                | 80  |
| Functional   | 2 2                                      |                                |     |
| Residues     | HH                                       | H HH H                         |     |
|              |                                          |                                |     |
|              |                                          | +---F---+        +-----G-----+ |     |
| flounder 1   | DIKGVYSALSTMHSEKLVDPDNFLLAECISVCVAAKFG   |                                | 120 |
| flounder 2   | -----                                    |                                | 120 |
| yellowtail A | --nt-ak--q-----t-----                    |                                | 119 |
| yellowtail B | --nt-ak--r-----a-----                    |                                | 120 |
| human        | nl--tfat--el--cd-----e-----gnvlvcvl-hh-- |                                | 120 |
| Functional   |                                          | 222 2 2 1 1 11 1               |     |
| Residues     | H H HH                                   | H H HH H                       |     |
|              |                                          |                                |     |
|              |                                          | +-----H-----+                  |     |
| flounder 1   | PSVFTAEVQEAQKFLSVVVSALGRQYH              |                                | 148 |
| flounder 2   | -----                                    |                                | 148 |
| yellowtail A | kq---d-----                              |                                | 147 |
| yellowtail B | kqa---d-----a-----                       |                                | 148 |
| human        | .ke--pp--a-y--vvag-an--ahk--             |                                | 147 |
| Functional   | 1111 11 1                                | 22                             |     |
| Residues     |                                          | H                              |     |

 $\beta$ -globin

Supp.fig.2

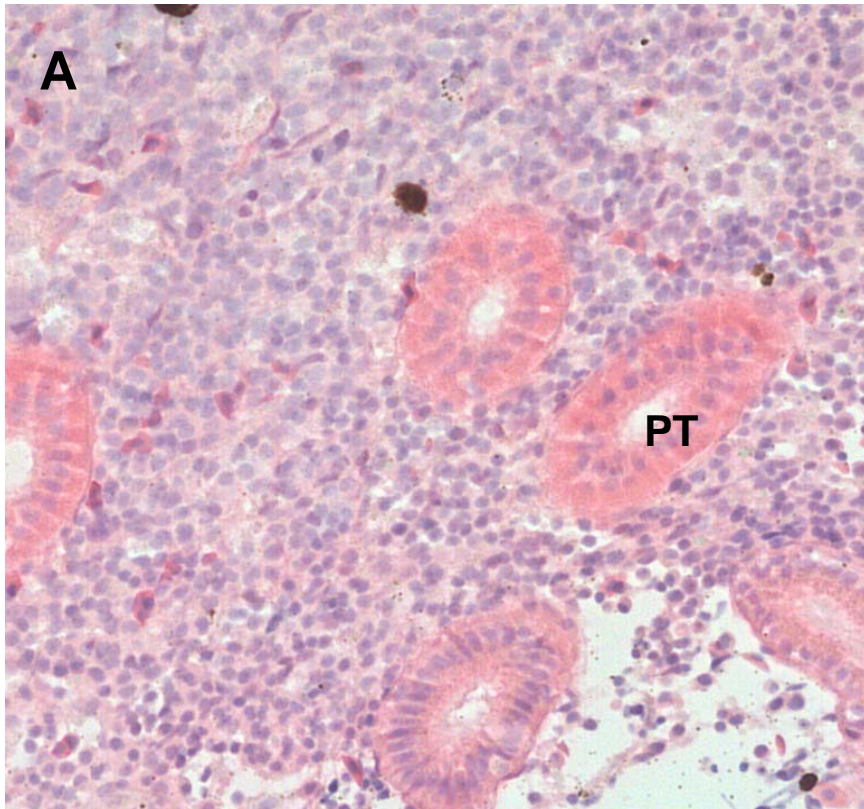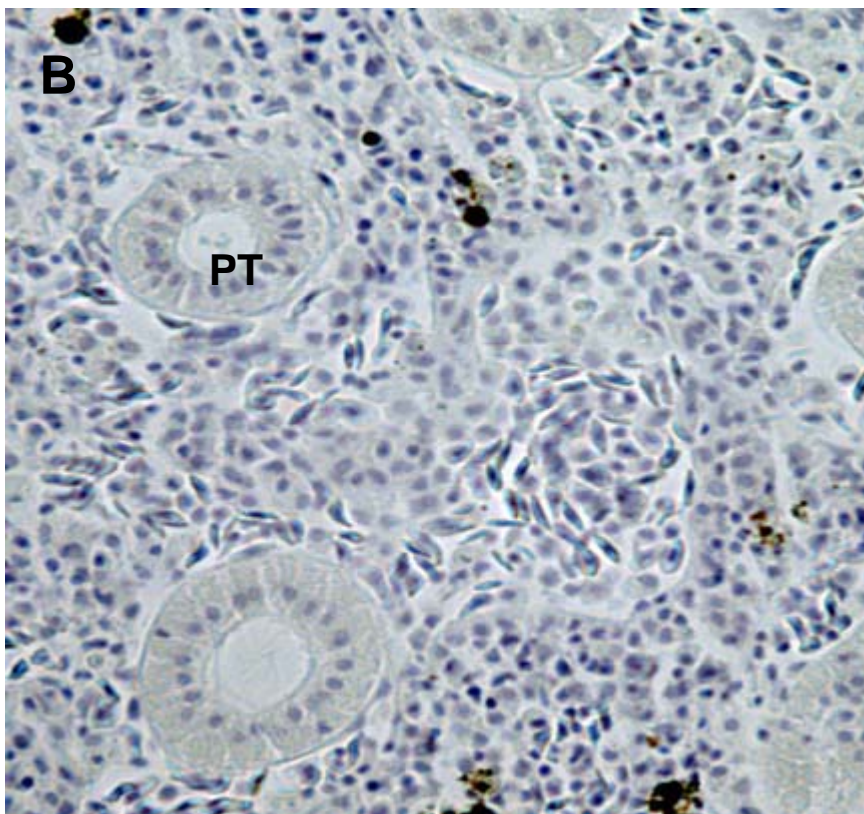

Supplement: f1 [file 965153.f1.pdf]
